# Supplementary material for: In silico Identification of Potential Peptides or Allergen Shot Candidates Against Aspergillus fumigatus
Source: PubMed Central journal article supplement (PMC5116691; doi:10.1089/biores.2016.0035), 2016-11-01

## Supplementary Data

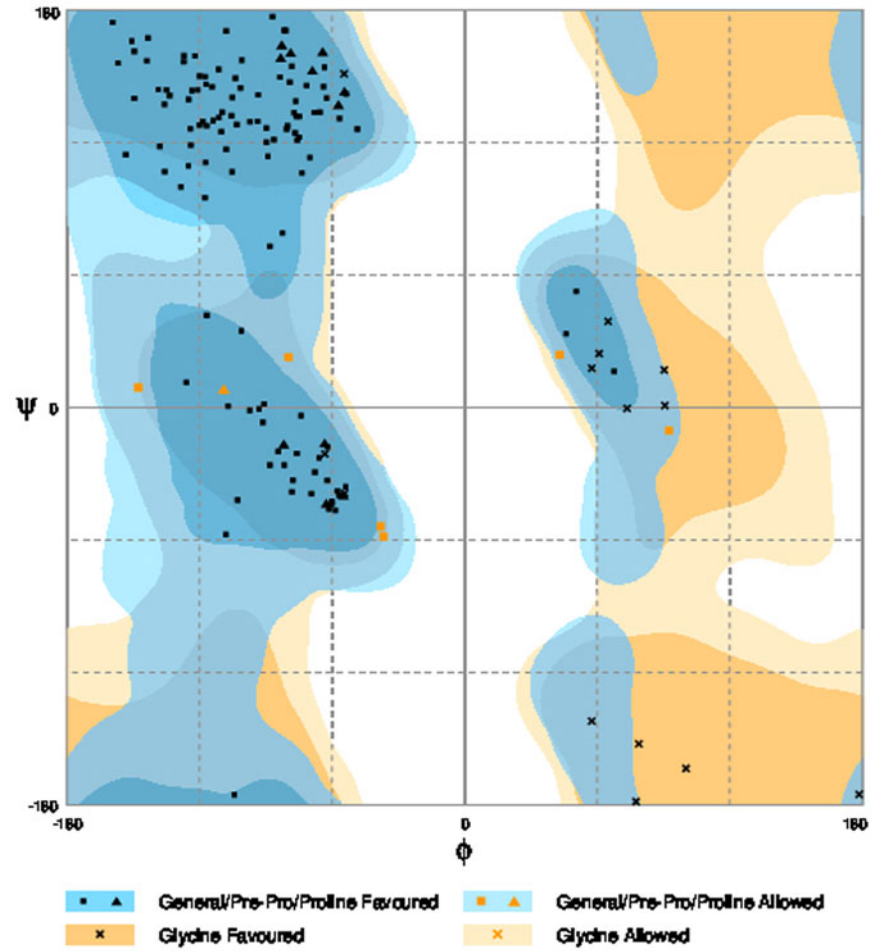

**SUPPLEMENTARY FIG. S1.** Ramachandran plot of *Asp f1* modeled structure.

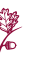

Supplement: Supp_Figure1.pdf [file Supp_Figure1.pdf]
