# Supplementary material for: In silico Identification of Potential Peptides or Allergen Shot Candidates Against Aspergillus fumigatus
Source: PubMed Central journal article supplement (PMC5116691; doi:10.1089/biores.2016.0035), 2016-11-01

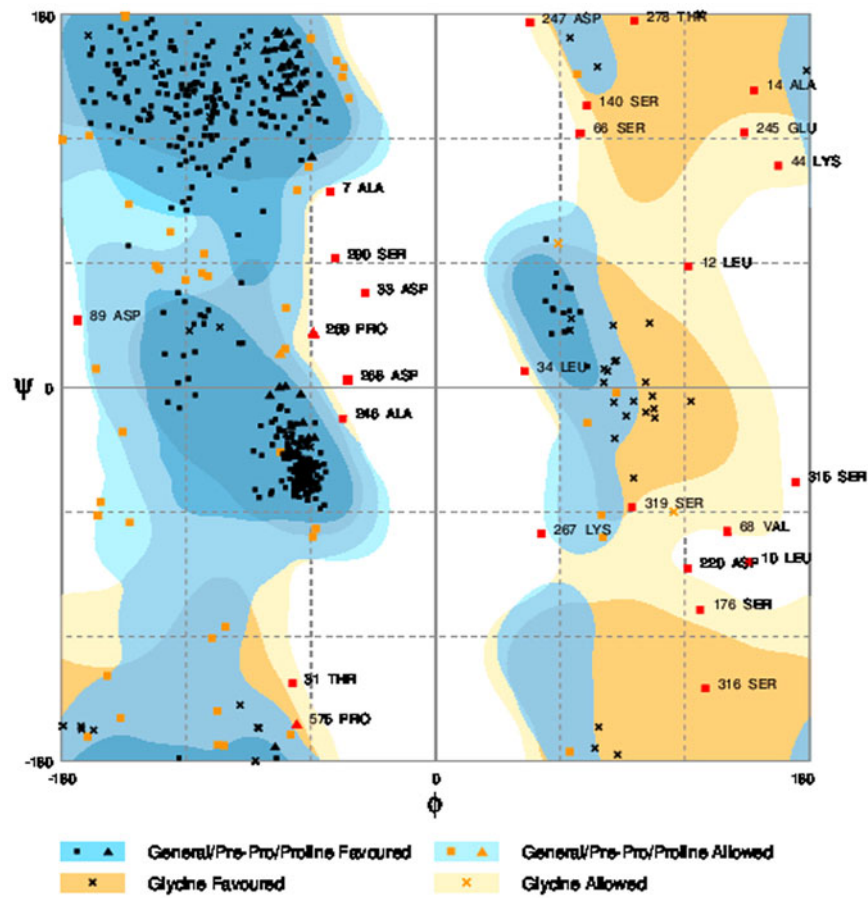

**SUPPLEMENTARY FIG. S2.** Ramachandran plot of *Asp f5* modeled structure.

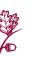

Supplement: Supp_Figure2.pdf [file Supp_Figure2.pdf]
